# Supplementary material for: Argonaute of the archaeon Pyrococcus furiosus is a DNA-guided nuclease that targets cognate DNA
Source: PubMed Central journal article supplement — Nucleic Acids Res. 2015 Apr 29;43(10):5120–9. doi: 10.1093/nar/gkv415 (PMC4446448; doi:10.1093/nar/gkv415), 2015-04-29
Supplement: supp_gkv415_nar-00636-h-2015-File007.pdf [file supp_gkv415_nar-00636-h-2015-File007.pdf]

**SUPPLEMENTARY DATA**

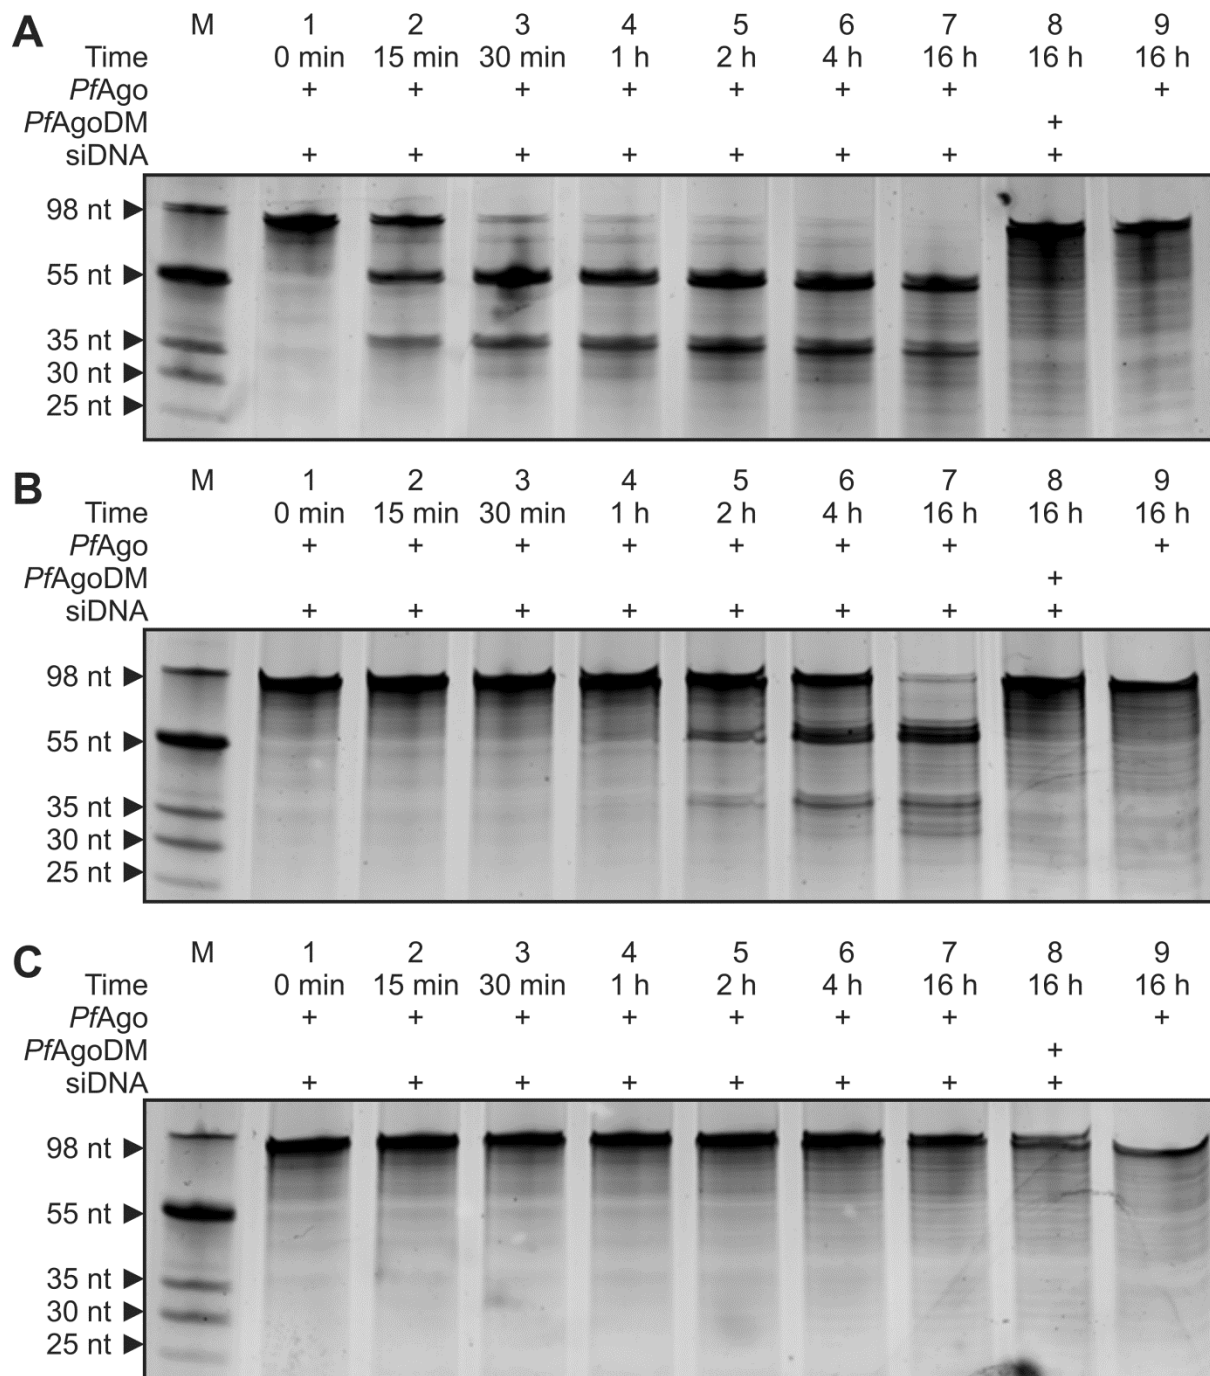

**Supplementary Figure S1.**

*PfAgo*-siDNA complexes show multi-turnover activity. *PfAgo*, siDNAs and target ssDNAs (Fig. 2C) were incubated in a 2.5:1:20 ratio (*PfAgo*:siDNA:target) and incubated at 95 °C in buffer with (A) 250 mM NaCl, (B) 500 mM NaCl or (C) 1M NaCl. Nucleic acids are resolved on denaturing polyacrylamide gels. siDNA concentrations are below detection limits. M: ssDNA marker. nt: nucleotide.

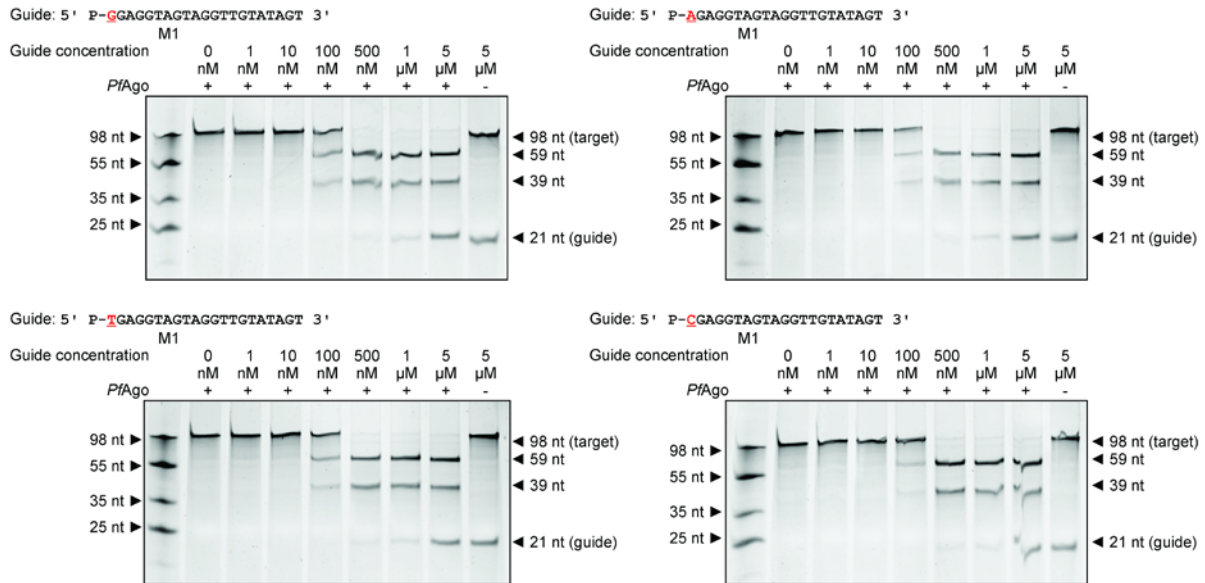

**Supplementary Figure S2.**

Effect of the variation of the 5'-end deoxynucleoside of the siDNA on *PfAgo* cleavage efficiency. Cleavage of 98 nucleotide ssDNA targets by *PfAgo* loaded with complementary siDNAs containing a different 5'-end deoxynucleoside, as shown in red above each gel. The concentrations of each siDNA were varied (indicated on top of the gels). Products of the reactions were resolved on denaturing polyacrylamide gels. M1: ssDNA marker. Samples without *PfAgo* (indicated with '-') contain *PfAgoDM* as control.

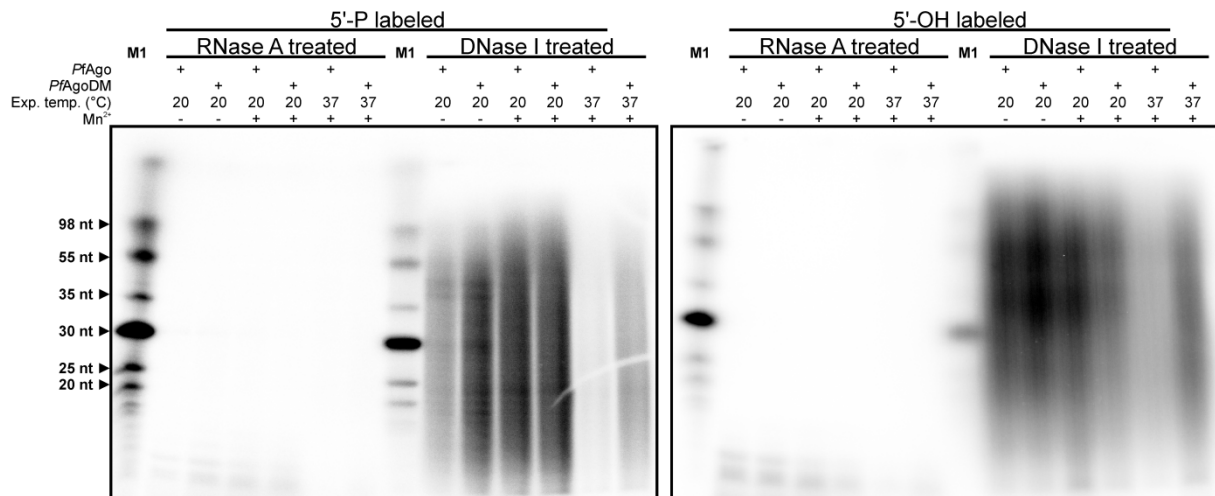

**Supplementary Figure S3.**

Nucleic acids co-purifying with *PfAgo* and *PfAgoDM*. Co-purified nucleic acids are 5' phosphorylated in a T4 PNK exchange reaction (left panel; 5'-P groups, and to a lesser extend 5'-OH groups are labeled) or in a T4 PNK forward reaction (right panel; 5'-OH groups, and to a lesser extend 5'-P groups are labeled) using [ $\gamma$ -<sup>32</sup>P] ATP and resolved on 20% denaturing polyacrylamide gels. Nucleic acids were not treated, RNase A treated or DNase I treated. M1: ssDNA marker, labeled in a T4 PNK forward reaction. Exp. temp: Expression temperature. Mn<sup>2+</sup>: indicates whether the protein was purified in absence (-) or presence (+) of Mn<sup>2+</sup>.

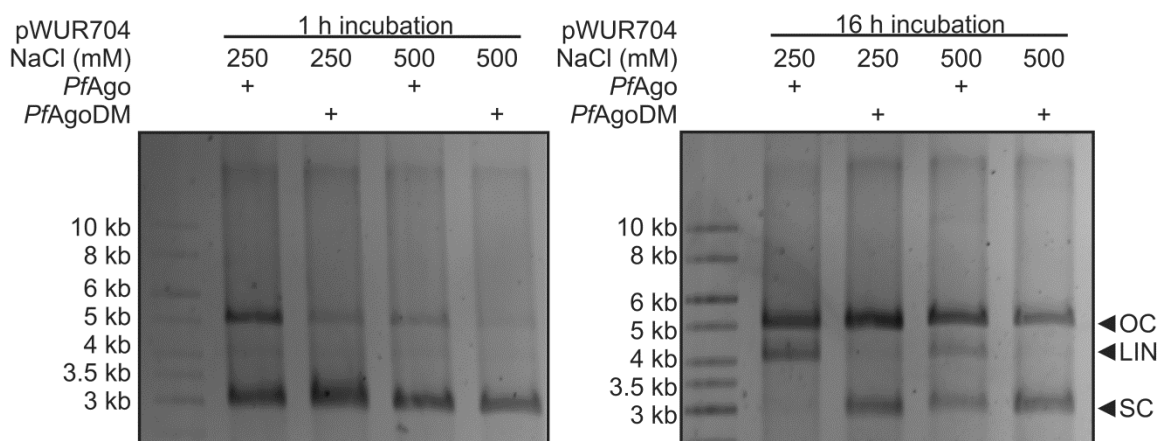

**Supplementary Figure S4.**

Guide-free *PfAgo* activity on pWUR704. pWUR704 was incubated with *PfAgo* and *PfAgoDM* for 1 h or 16 h at 75°C at different final NaCl concentrations, and resolved on 0.75% agarose gels. Left lane: 1 kb generuler (Thermo Scientific). OC: open circular. LIN: linear. SC: Supercoiled.

**Table S1: Strains**

| Strain                                               | Abbreviations                      | Description                                                   | Source, reference |
|------------------------------------------------------|------------------------------------|---------------------------------------------------------------|-------------------|
| <i>Pyrococcus furiosus</i> JFW02                     | Pfu, wild type                     | <i>Pyrococcus furiosus</i> JFW02                              | (17)              |
| <i>Pyrococcus furiosus</i> $\Delta$ ago              | Pfu $\Delta$ ago, knockout         | <i>Pyrococcus furiosus</i> ago gene (PF0537) knockout         | This chapter      |
| <i>Pyrococcus furiosus</i> ago overexpression strain | Pfu-ago-O/E, overexpression strain | <i>Pyrococcus furiosus</i> <i>PfAgo</i> overexpressing strain | This chapter      |
| <i>Escherichia coli</i> KRX                          | <i>E. coli</i> KRX                 | <i>E. coli</i> expression strain                              | Promega           |

**Table S2: Plasmids**

| Plasmid | Description                                                                                                                                    | Restriction sites used | Primers                                   | Source, reference  |
|---------|------------------------------------------------------------------------------------------------------------------------------------------------|------------------------|-------------------------------------------|--------------------|
| pHSG298 | <i>PfAgo</i> overexpression cassette genome insertion vector                                                                                   |                        | PF1223_1224_1-8<br>PfAgo_fow<br>PfAgo_rev | This study         |
| pYS3    | <i>E. coli/P. furiosus</i> shuttle vector, Amp <sup>R</sup> , pyrF under control of gdh promoter                                               | BamHI                  | Pgdh_pyrF_fow<br>Pgdh_pyrF_rev            | (20)               |
| pJFW18  | <i>E. coli/P. furiosus</i> shuttle vector, Apr <sup>R</sup> , pyrF under control of gdh promoter                                               |                        | -                                         | (19)               |
| pCDF-1b | Expression vector                                                                                                                              |                        | -                                         | Novagen            |
| pWUR790 | Synthetic codon optimized <i>P. furiosus</i> ago with N-terminal <i>strep(II)</i> -tag in pCDF-1b vector, expression vector for <i>PfAgo</i> . | NcoI, AvrII            | -                                         | GenScript USA Inc. |
| pWUR791 | pWUR790, ago active site residue substituted (D558A)                                                                                           |                        | BG5480<br>BG5481                          | This study         |
| pWUR792 | pWUR790, ago active site residue substituted (E592A)                                                                                           |                        | BG5482<br>BG5483                          | This study         |
| pWUR793 | pWUR790, ago active site residue substituted (E596A)                                                                                           |                        | BG5484<br>BG5485                          | This study         |
| pWUR794 | pWUR790, ago active site residue substituted (D628A)                                                                                           |                        | BG5486<br>BG5487                          | This study         |
| pWUR795 | pWUR790, ago active site residue substituted (H745A)                                                                                           |                        | BG5488<br>BG5489                          | This study         |
| pWUR796 | pWUR791, two ago active site residue substituted (D558A,D628A)                                                                                 |                        | BG5486<br>BG5487                          | This study         |
| pWUR704 | Target plasmid                                                                                                                                 |                        | -                                         | (11)               |

**Table S3: Oligonucleotides**

| Experiment                            | Primers                         | Sequence (5'-3')                                                                                         | Description, restriction sites                              |
|---------------------------------------|---------------------------------|----------------------------------------------------------------------------------------------------------|-------------------------------------------------------------|
| Pfu-ago-O/E strain                    | PF1223_1224_1                   | CCAGTGTCCAAGCTTGCATGCACCGGTGCGGCCGCACGCGTTTAAACGGTTCCTCAAGCGTATTTTGG                                     | PF1223 (FW)                                                 |
|                                       | PF1223_1224_2                   | CTCAGCTCACTCCATTTTCAATCATCCATCCACTGAGAATATTGAAAG                                                         | PF1233 (RV)                                                 |
|                                       | Pgdh_PyrF_F                     | GATTGAAAATGGAGTGAGCTGAG                                                                                  | trpAB (FW)                                                  |
|                                       | TrpAB_Csg_4                     | TAATTCGCCCTTTTGCCGATAGTCGATTGGCTGAGCTCATG                                                                | trpAB (RV)                                                  |
|                                       | Ptk_csg_fow                     | TATCGGCAAAAGGCGAATTATG                                                                                   | csg promoter (FW)                                           |
|                                       | Ptk_csg_rev                     | GAGGAAGCGGAGGTTCCA                                                                                       | csg promoter (RV)                                           |
|                                       | PF1223_1224_7                   | TGGAACCTCCGCTTCTCTTCTCTACTAGATCCGTTATC                                                                   | PF1224 (FW)                                                 |
|                                       | PF1223_1224_8                   | TATGACATGATTACGAATTCTACGTATCCGGATTAATTAATTTAAATGGTTAGATAAGAATCCGCTGAA                                    | PF1224 (RV)                                                 |
| PfuAgo                                | PfAgo_fow                       | CAACCCAAGGAGGTGTTGTCTATATGAAAGCGAAAAGTTGTTATTAATCT                                                       | ago (FW)                                                    |
|                                       | PfAgo_rev                       | AAAGAGGAGAAGAGAGGGGGATCCCTCAAACAAAATACAAAAATCCCTCA                                                       | ago (FW)                                                    |
| PfuAgo                                | PfAgo_del_1                     | TCTCTTCTGGCCGTGTATCT                                                                                     | Upstream region ago (FW)                                    |
|                                       | PfAgo_del_2                     | CTCAGCTCACTCCATTTTCAATCCATTAACCTTTTCTATTTAAACAA TTTCTAACCT                                               | Upstream region ago (RV)                                    |
|                                       | PfAgo_del_5                     | GGTGAAAGAATGGAGCTCAAGATAATTGAGGAATTTAGTTCTAGTTCTCAGG                                                     | Upstream region ago (FW)                                    |
|                                       | PfAgo_del_6                     | CATTAACCTTTTCTATTTAAACAATTTCTAACCT                                                                       | Upstream region ago (RV)                                    |
|                                       | PfAgo_del_7                     | AGGTTAGAAAATGTTTAAATAGAAAAAGTTAATGATTATCACCAA GTGATTACAATTAATATCA                                        | Downstream region ago (FW)                                  |
|                                       | PfAgo_del_8                     | TGTTTCATCAACAGGGAGGAA                                                                                    | Downstream region ago (RV)                                  |
|                                       | Pgdh_PyrF_F                     | GATTGAAAATGGAGTGAGCTGAG                                                                                  | Pgdh pyrF cassette (FW)                                     |
|                                       | Pgdh_PyrF_R                     | TTATCTTGAGCTCCATTTTCACC                                                                                  | Pgdh pyrF cassette (RV)                                     |
| pYS3                                  | Pgdh_pyrF_fow                   | AGCTTCTCTGCAGGATATCTGGATCCGATTGAAAATGGAGTGAGCTG                                                          | Pgdh pyrF cassette (FW)                                     |
|                                       | Pgdh_pyrF_rev                   | GCCGAAGCTAGCGAATTCGTGGATCCGTGCTGATTGGCTGAGCTCATG                                                         | Pgdh pyrF cassette (RV)                                     |
| Site directed mutagenesis of ago gene | BG5480                          | GATTATATCATTGGCATTGTGTGGCACCGATGAAACG                                                                    | <i>P. furiosus ago</i> D558A (FW)                           |
|                                       | BG5481                          | CGTTTCATCGGTGCCACAGCAATGCCAATGATATAATC                                                                   | <i>P. furiosus ago</i> D558A (RV)                           |
|                                       | BG5482                          | CCGATTAATAATCGGTGCACAGCGTGGTGAAGCG                                                                       | <i>P. furiosus ago</i> E592A (FW)                           |
|                                       | BG5483                          | CGCTTTCACCACGCTGTGCACCGATTTAATCGG                                                                        | <i>P. furiosus ago</i> E592A (RV)                           |
|                                       | BG5484                          | GGTGAACAGCGTGGTGC AAGCGTTGATATGAACG                                                                      | <i>P. furiosus ago</i> E596A (FW)                           |
|                                       | BG5485                          | CGTTCATATCAACGCTTGCACCACGCTGTTCACC                                                                       | <i>P. furiosus ago</i> E596A (RV)                           |
|                                       | BG5486                          | CCTGCTGCTGCGTGTGGTTCGCAATTACCAATAATG                                                                     | <i>P. furiosus ago</i> D628A (FW)                           |
|                                       | BG5487                          | CATTATTGGTAAATGCGACCAGCAGCAGCAGCAGG                                                                      | <i>P. furiosus ago</i> D628A (RV)                           |
|                                       | BG5488                          | CCTGCACCGTTTATTATGCAGCTAAATTTGCCAATGCCATTCG                                                              | <i>P. furiosus ago</i> H745A (FW)                           |
|                                       | BG5489                          | CGAATGGCATTGGCAAATTTAGCTGCATAATGAACCGGTGCAGG                                                             | <i>P. furiosus ago</i> H745A (RV)                           |
| siDNA and siRNA sequences             | BG3466                          | P-TGAGGTAGTAGGTTGTATAGT                                                                                  | 21 nt DNA guide (FW), based on let-7 miRNA                  |
|                                       | BG4017                          | P-TTATACAACCTACTACCTCGT                                                                                  | DNA guide (RV), based on reverse complement of let-7 miRNA  |
|                                       | BG4500                          | P-AGAGGTAGTAGGTTGTATAGT                                                                                  | DNA guide (FW), based on let-7 miRNA, 5'-end deoxyadenosine |
|                                       | BG4501                          | P-GGAGGTAGTAGGTTGTATAGT                                                                                  | DNA guide (FW), based on let-7 miRNA, 5'-end deoxyguanosine |
|                                       | BG4502                          | P-CGAGGTAGTAGGTTGTATAGT                                                                                  | DNA guide (FW), based on let-7 miRNA, 5'-end deoxycytidine  |
|                                       | BG4503                          | P-TGAGGTAGTAGGTTGTATAGT                                                                                  | DNA guide (FW), based on let-7 miRNA, 5'-end deoxythymidine |
|                                       | BG4508                          | P-UGAGGUAGUAGGUUGUAUAGU                                                                                  | RNA guide (FW), based on let-7 miRNA                        |
|                                       | BG5599                          | P-TGAGGTAG                                                                                               | 8 nt DNA guide based on BG3466                              |
|                                       | BG5600                          | P-TGAGGTAGT                                                                                              | 9 nt DNA guide based on BG3466                              |
|                                       | BG5601                          | P-TGAGGTAGTA                                                                                             | 10 nt DNA guide based on BG3466                             |
|                                       | BG5602                          | P-TGAGGTAGTAG                                                                                            | 11 nt DNA guide based on BG3466                             |
|                                       | BG5641                          | P-TGAGGTAGTAGG                                                                                           | 12 nt DNA guide based on BG3466                             |
|                                       | BG5713                          | P-TGAGGTAGTAGGT                                                                                          | 13 nt DNA guide based on BG3466                             |
|                                       | BG5714                          | P-TGAGGTAGTAGGTT                                                                                         | 14 nt DNA guide based on BG3466                             |
|                                       | BG5713                          | P-TGAGGTAGTAGGTTG                                                                                        | 15 nt DNA guide based on BG3466                             |
|                                       | BG5640                          | P-TGAGGTAGTAGGTTGT                                                                                       | 16 nt DNA guide based on BG3466                             |
| BG5603                                | P-TGAGGTAGTAGGTTGTATAGTATATTAAT | 31 nt DNA guide based on BG3466                                                                          |                                                             |
| Target sequences                      | BG4263                          | TCGACTTTATATTTAAATAATTTAATATACTATACAACCTACTACCTCGTATAAAATTTTAAATAAATATTGCATTC AAGCTTTTAAATTTAATTAAT AAAT | 98 nt RV ssDNA target                                       |
|                                       | BG3678                          | AAACGACGGCCAGTGCC AAGCTTACTATACAACCTACTACCTCAT                                                           | 45 nt RV ssDNA target                                       |
|                                       | BG4427                          | AAACGACGGCCAGUGCCAAGCUUACUAUACAACCUACUACCUCAU                                                            | 45 nt RV ssRNA target                                       |
